# Supplementary material
Source: PubMed Central journal article supplement (PMC3540157)
Supplement: NIHMS430985-supplement-1_si_001.pdf [file NIHMS430985-supplement-1_si_001.pdf]

**Table S1**

List of single non-essential gene deletion mutants that grew invasively in a genome-wide screen

| Name          | ORF     | Agar Penetration-<br>No Salt | Agar Penetration-<br>0.5 M KCl | Salt Sensitivity | Protein Product                                                            |
|---------------|---------|------------------------------|--------------------------------|------------------|----------------------------------------------------------------------------|
| <i>HOG1*</i>  | YLR113W | -                            | +++                            | +                | HOG pathway MAPK                                                           |
| <i>PBS2*</i>  | YJL128C | -                            | +++                            | +                | HOG pathway MAPKK                                                          |
| <i>MNN11*</i> | YJL183W | -                            | ++                             | -                | Subunit of a Golgi mannosyltransferase complex                             |
| <i>PUN1</i>   | YLR414C | +                            | +                              | -                | Putative protein of unknown function                                       |
| <i>SIN4</i>   | YNL236W | ++                           | ++                             | +                | Subunit of the RNA polymerase II mediator complex                          |
| <i>SNF4</i>   | YGL115W | ++                           | ++                             | +                | Activating gamma subunit of the AMP-activated Snf1p kinase complex         |
| <i>TPS2</i>   | YDR074W | +                            | ++                             | -                | Phosphatase subunit of trehalose-6-phosphate synthase/phosphatase complex  |
| <i>KEX2</i>   | YNL238W | +                            | +                              | -                | Subtilisin-like protease (proprotein convertase)                           |
| <i>SPE1</i>   | YKL184W | ++                           | -                              | +                | Ornithine decarboxylase                                                    |
| <i>ASC1</i>   | YMR116C | +                            | -                              | -                | G-protein beta subunit and GDI for Gpa2p                                   |
| <i>HDA2</i>   | YDR295C | ++                           | -                              | -                | Subunit of a trichostatin A-sensitive class II histone deacetylase complex |
| <i>APM3</i>   | YBR288C | +                            | -                              | -                | Mu3-like subunit of the clathrin associated protein complex (AP-3)         |

Each strain was screened in duplicate; The phenotypes are categorized as follows: wild type-like, -; weak, +; medium, ++; strong, +++

\*Only these single deletion mutants were validated by reconstructing the strain.

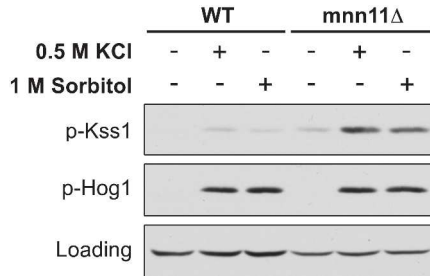

**Figure S1. Deletion of *MNN11* results in hyperactivation of Kss1 in response to osmotic stress.** Activation of Kss1 and Hog1; Wild-type and *mnn11Δ* cells were stimulated with either 0.5 M KCl or 1 M sorbitol for 5 min. Cell lysates were resolved by 10% SDS-PAGE. Phospho-Kss1 (p-Kss1) and phospho-Hog1 (p-Hog1) were detected by immunoblotting with phospho-p44/42 and phospho-p38 antibodies, which recognize the dually phosphorylated and activated forms of Kss1 and Hog1. G6PDH served as a loading control.

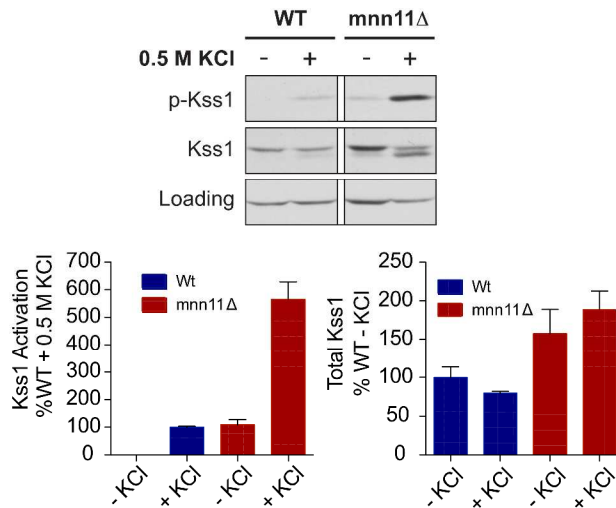

**Figure S2. Deletion of *MNN11* results in 2-fold overexpression of Kss1.** The 2-fold higher expression of Kss1 and phospho-Kss1 coincide with the higher basal transcription activity observed in the deletion strain (Figure 2C). WT and *mnn11Δ* cells were stimulated with 0.5 M KCl for 5 min. Cell lysates were resolved by 10% SDS-PAGE. Specific antibodies were used to detect the dually phosphorylated, fully activated forms of Kss1 (p-Kss1). Total Kss1 abundance was determined with Kss1 specific antibodies. Note that total Kss1 is seen as a doublet, in which the bottom band is the activated form as previously published (1). G6PDH served as a loading control. The bottom panels show quantitation of band intensity. Error bars represent  $\pm$  SEM.

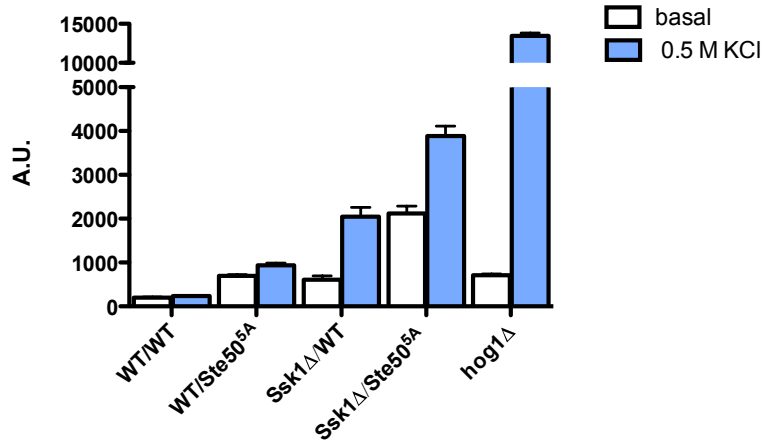

**Figure S3. Ste50 phosphorylation limits Kss1 activation by the Sho1 branch of the HOG pathway.** Transcriptional activation ( $\beta$ -galactosidase activity) was measured spectrofluorometrically in *ste50* $\Delta$  (WT) and *ste50* $\Delta$ *ssk1* $\Delta$  mutant cells, transformed with either pRS316-STE50 or pRS316-*ste50*<sup>5A</sup> and a pheromone-inducible reporter (pRS423-FUS1-lacZ). Transcription was induced by the addition of 0.5 M KCl. Data are the mean  $\pm$  SE of 4 individual colonies measured in triplicate. A.U., arbitrary units.

## Reference

1. Yu, R. C., Pesce, C. G., Colman-Lerner, A., Lok, L., Pincus, D., Serra, E., Holl, M., Benjamin, K., Gordon, A., and Brent, R. (2008) Negative feedback that improves information transmission in yeast signalling, *Nature* 456, 755-761.
